# Supplementary material for: Targeting myeloid regulators by paclitaxel-loaded enzymatically degradable nanocups
Source: Royal Society of Chemistry journal article supplement (doi:10.1039/c8nr04437f), 2018-01-01
Supplement: c8nr04437f1.pdf [file c8nr04437f1.pdf]

## Supporting Information

### Targeting myeloid regulators by paclitaxel-loaded enzymatically degradable cups

*Seth C. Burkert,<sup>a</sup> Galina V. Shurin,<sup>b</sup> David L. White,<sup>a</sup> Xiaoyun He,<sup>a</sup> Alexandr A. Kapralov,<sup>c</sup> Valerian E. Kagan,<sup>a,c,d,e,f</sup> Michael R. Shurin,<sup>b,g</sup> and Alexander Star<sup>a\*</sup>*

<sup>a</sup>Department of Chemistry, University of Pittsburgh, Pittsburgh, Pennsylvania 15260, United States

<sup>b</sup>Department of Pathology, University of Pittsburgh Medical Center, Pittsburgh, Pennsylvania 15261, United States

<sup>c</sup>Department of Environmental and Occupational Health, University of Pittsburgh, Pittsburgh Pennsylvania, United States

<sup>d</sup>Department of Pharmacology and Chemical Biology, University of Pittsburgh, Pittsburgh Pennsylvania, United States

<sup>e</sup>Department of Radiation Oncology, University of Pittsburgh, Pittsburgh Pennsylvania, United States

<sup>f</sup>Laboratory of Navigational Redox Lipidomics, IM Sechenov Moscow State Medical University, Russia

<sup>g</sup>Department of Immunology, University of Pittsburgh Medical Center, Pittsburgh, Pennsylvania 15261, United States

\*Corresponding Author Email: [astar@pitt.edu](mailto:astar@pitt.edu)

## Table of Contents

|                                                                                              |     |
|----------------------------------------------------------------------------------------------|-----|
| <b>Figure S1:</b> TEM images of Au-NCNC .....                                                | S-3 |
| <b>Figure S2:</b> Raman characterization of Au-NCNC.....                                     | S-4 |
| <b>Figure S3:</b> Survey XPS characterization of Au-NCNC.....                                | S-5 |
| <b>Table S1:</b> Table summarizing atomic percentages of NCNC as determined by survey XPS... | S-5 |
| <b>Figure S4:</b> Photographs of colloidal stability of paclitaxel loaded Au-NCNC.....       | S-6 |
| <b>Figure S5:</b> LC-MS for quantification of paclitaxel .....                               | S-7 |
| <b>Figure S6:</b> Calibration curve for the quantification of paclitaxel.....                | S-7 |
| <b>Table S2:</b> ICP-MS bio-distribution of gold atoms.....                                  | S-8 |
| <b>Figure S7:</b> Homing of MDSC in mice receiving systemic paclitaxel.....                  | S-9 |

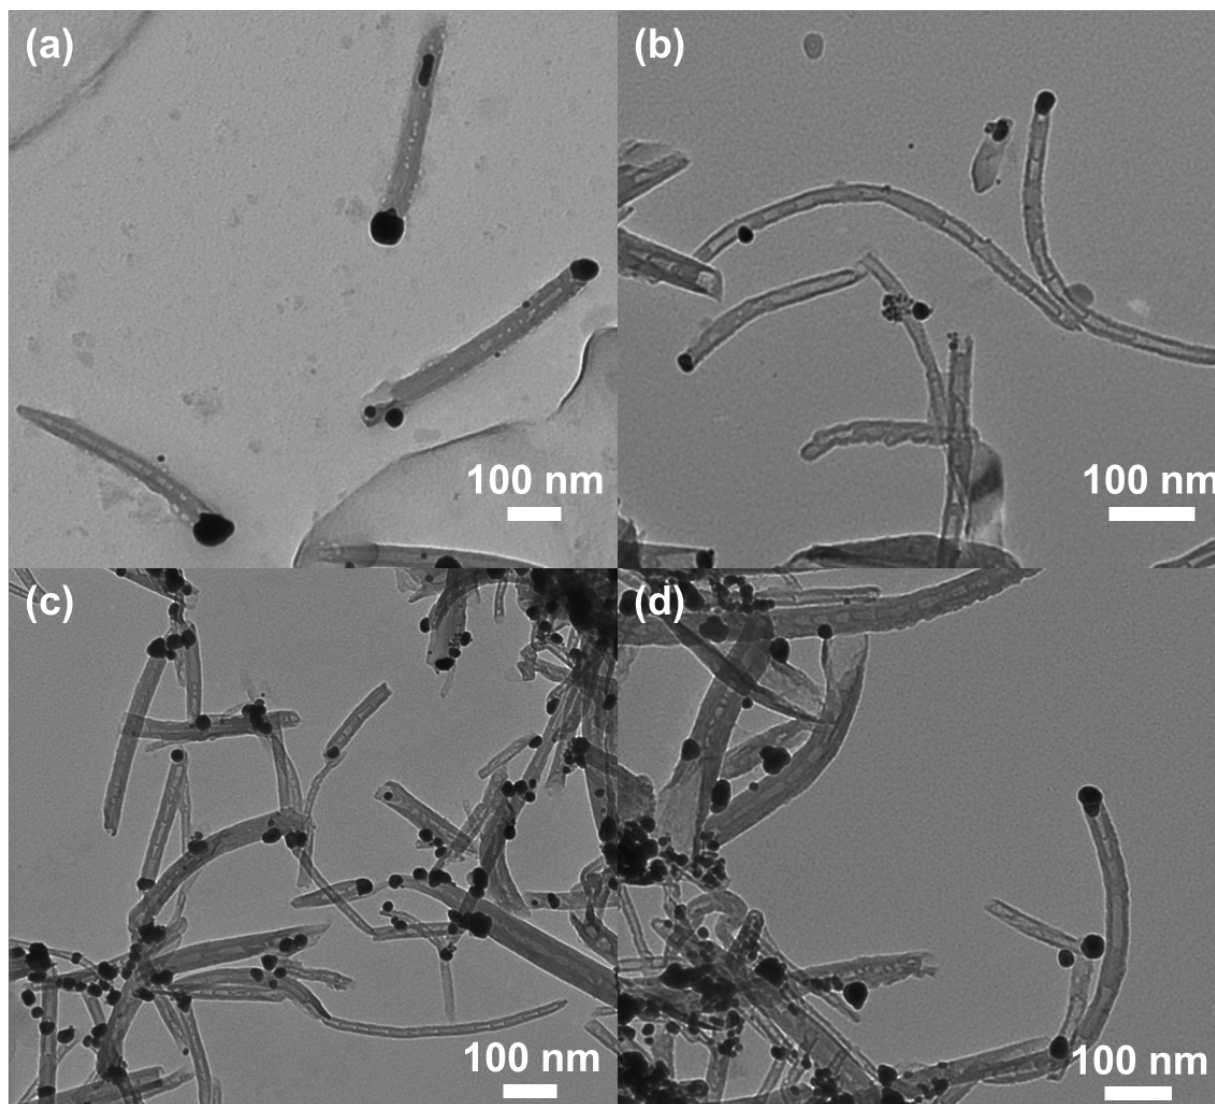

**Figure S1.** Representative TEM images of Au-NCNC synthesized in (a) nanopure water; (b) 1X phosphate buffer; (c) 1X phosphate buffer and ethanol; and (d) 1X phosphate buffer and paclitaxel suspended in ethanol. Observe that free gold nanoparticles are more abundant upon the addition of ethanol to the coking solution.

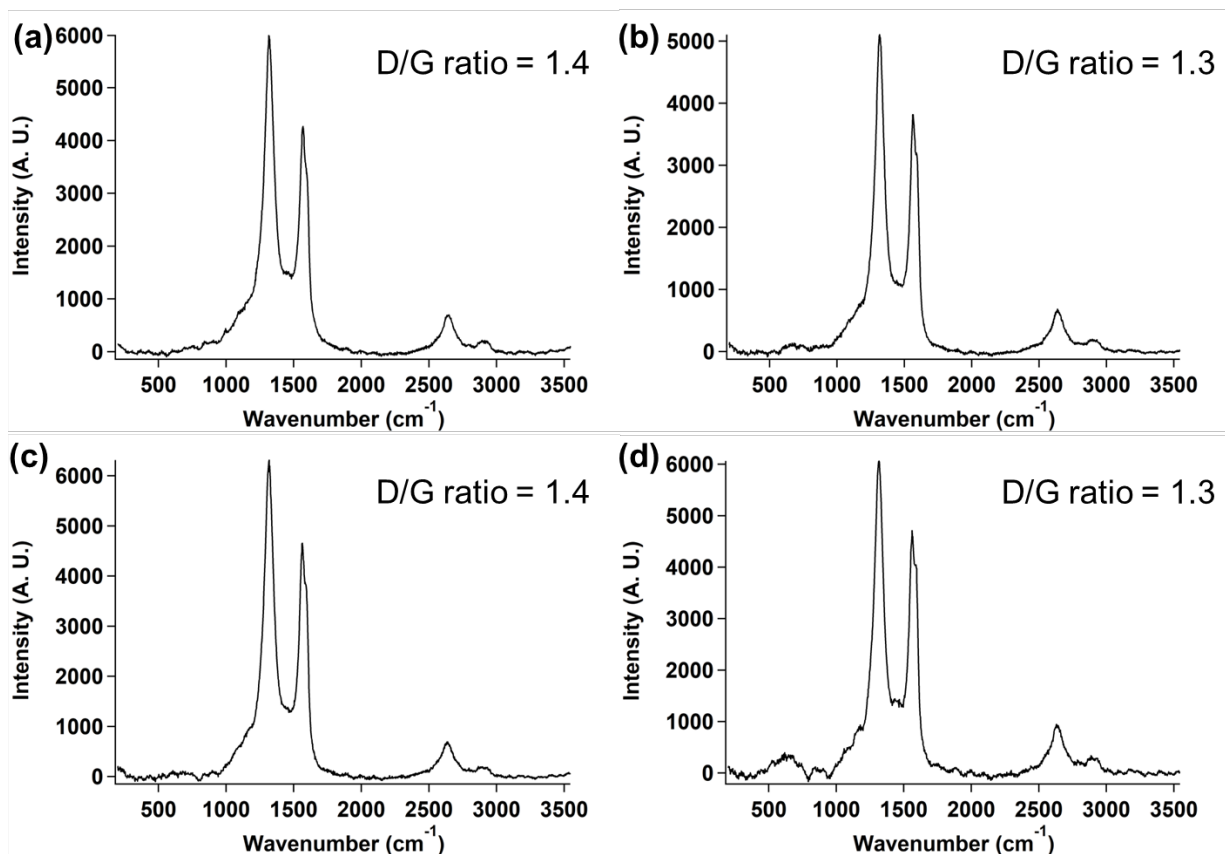

**Figure S2.** Raman characterization with inset D/G ratios for Au-NCNC synthesized in (a) nanopure water; (b) 1X phosphate buffer; (c) 1X phosphate buffer and ethanol; and (d) 1X phosphate buffer and paclitaxel suspended in ethanol.

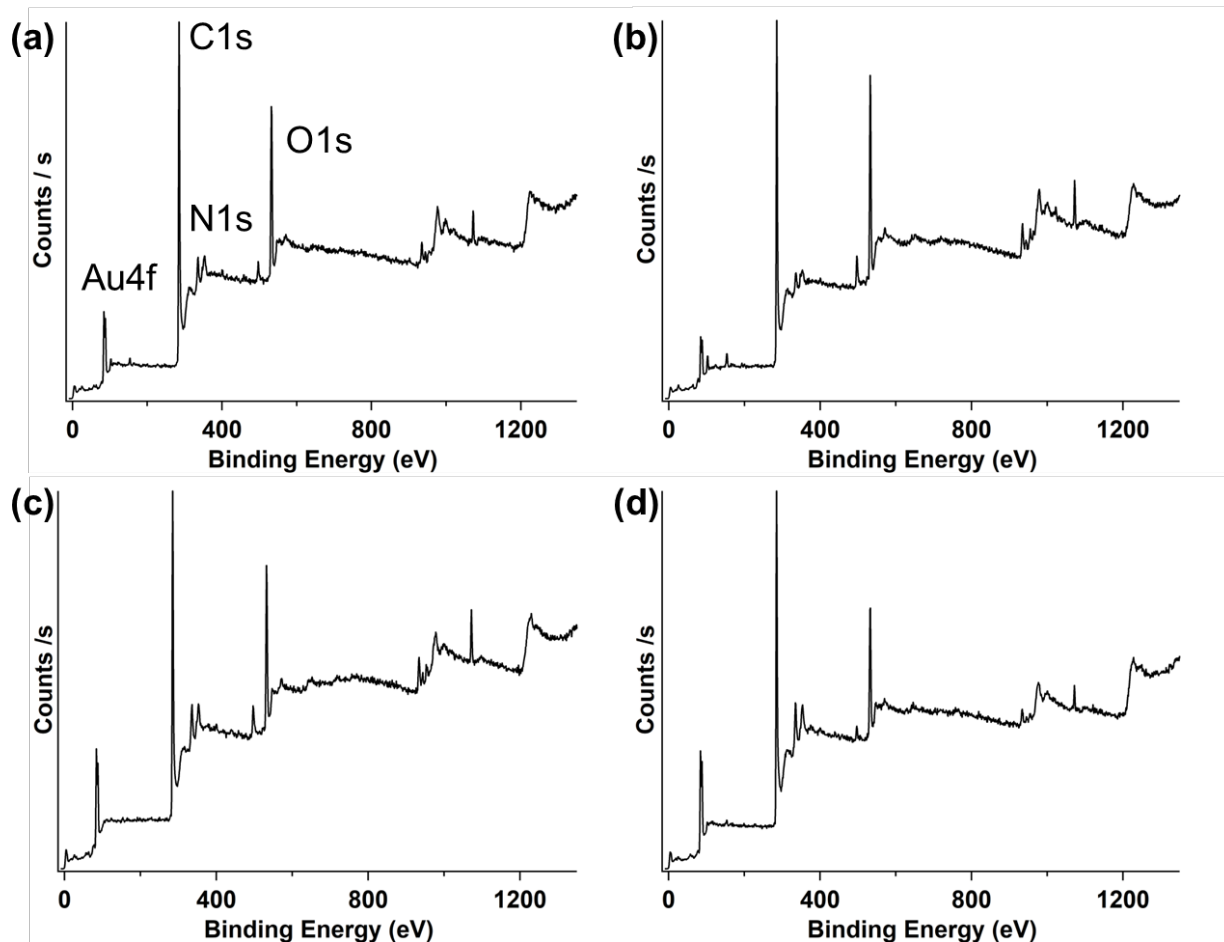

**Figure S3.** XPS survey characterization of Au-NCNC synthesized in (a) nanopure water; (b) 1X phosphate buffer; (c) 1X phosphate buffer and ethanol; and (d) 1X phosphate buffer and paclitaxel suspended in ethanol.

**Table S1.** Atomic percent of each Au-NCNC sample as determined by survey XPS

| Element | Normal  | Buffer  | Ethanol  | Taxol   |
|---------|---------|---------|----------|---------|
| C1s     | 79.07 % | 77.54 % | 79. 15 % | 82.42 % |
| O1s     | 18.03 % | 20.41 % | 17.09 %  | 14.94 % |
| N1s     | 1.84 %  | 1.36 %  | 2.26 %   | 1.05 %  |
| Au4f    | 1.06 %  | 0.69 %  | 1.50 %   | 1.60 %  |

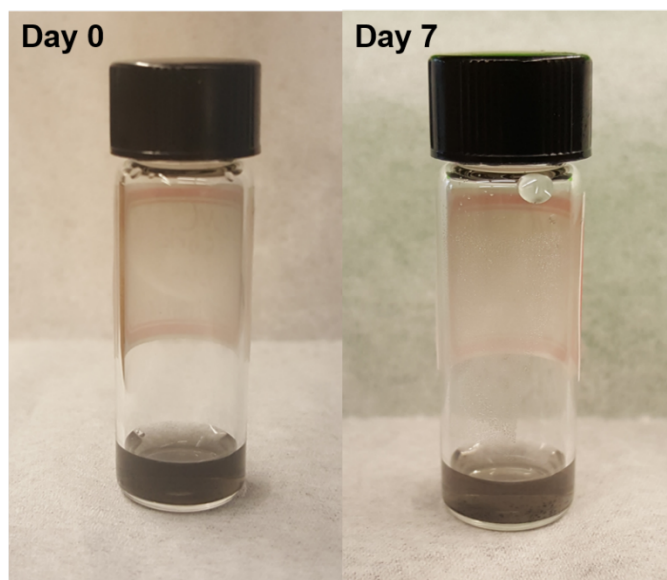

**Figure S4.** Photographs of paclitaxel loaded Au-NCNC on Day 0 and Day 7 illustrating colloidal stability of the particles.

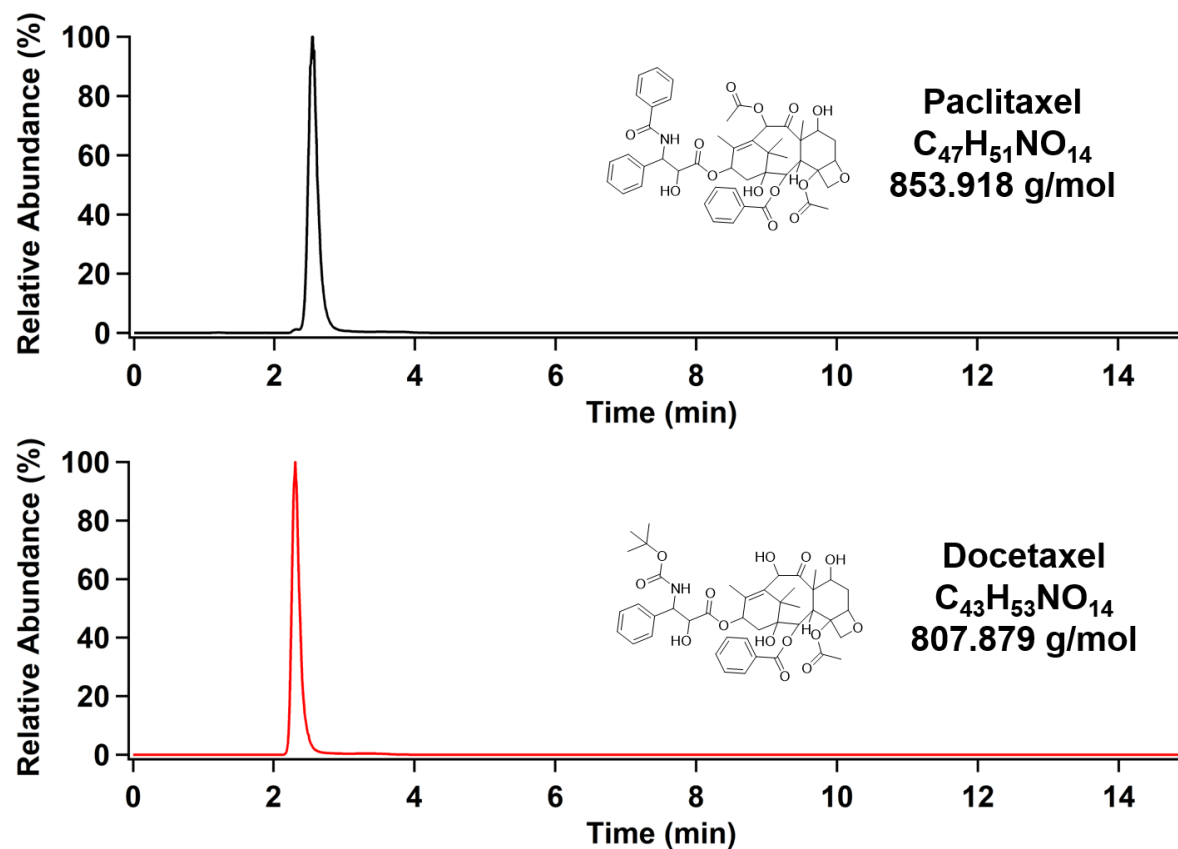

**Figure S5.** LC-MS chromatogram of paclitaxel and docetaxel with associated chemical structure and molecular weight.

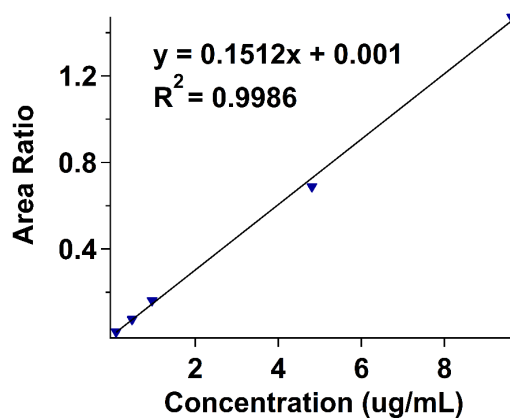

**Figure S6.** Calibration plot for the quantification of paclitaxel.

**Table S2.** Bio-distribution of gold atoms as detected by ICP-MS

|               | ppb Au / mg tissue            |                      |                           |
|---------------|-------------------------------|----------------------|---------------------------|
| <b>Day 6</b>  | <b>B16 melanoma (control)</b> | <b>Empty Au-NCNC</b> | <b>Paclitaxel Au-NCNC</b> |
| Heart         | 0.005 ± 0.000                 | 0.096 ± 0.003        | 0.062 ± 0.002             |
| Liver         | 0.035 ± 0.000                 | 18.260 ± 1.314       | 53.962 ± 1.150            |
| Lung          | 0.014 ± 0.000                 | 12.145 ± 0.141       | 6.384 ± 0.101             |
| Spleen        | 0.033 ± 0.001                 | 16.828 ± 0.887       | 39.069 ± 0.645            |
| Tumor         | 0.009 ± 0.001                 | 0.316 ± 0.013        | 0.138 ± 0.006             |
| <b>Day 8</b>  | <b>B16 melanoma (control)</b> | <b>Empty Au-NCNC</b> | <b>Paclitaxel Au-NCNC</b> |
| Heart         | 0.007 ± 0.000                 | 0.108 ± 0.001        | 0.145 ± 0.010             |
| Liver         | 0.006 ± 0.000                 | 81.204 ± 1.622       | 20.891 ± 0.363            |
| Lung          | 0.010 ± 0.001                 | 32.557 ± 0.620       | 0.892 ± 0.010             |
| Spleen        | 0.013 ± 0.001                 | 208.916 ± 2.561      | 42.387 ± 0.505            |
| Tumor         | 0.006 ± 0.000                 | 0.194 ± 0.009        | 0.066 ± 0.002             |
| <b>Day 13</b> | <b>B16 melanoma (control)</b> | <b>Empty Au-NCNC</b> | <b>Paclitaxel Au-NCNC</b> |
| Heart         | 0.016 ± 0.008                 | 0.055 ± 0.003        | 0.073 ± 0.003             |
| Liver         | 0.007 ± 0.000                 | 26.904 ± 0.134       | 16.118 ± 0.304            |
| Lung          | 0.026 ± 0.000                 | 63.950 ± 1.102       | 13.910 ± 0.329            |
| Spleen        | 0.025 ± 0.001                 | 123.912 ± 3.042      | 75.931 ± 1.034            |
| Tumor         | 0.006 ± 0.001                 | 0.068 ± 0.001        | 0.067 ± 0.003             |

Each sample was run in triplicate with the average of the triplicate measurements being reported ± the standard deviation of the measurements. The gold ppb concentration of each data point was normalized to the mass of the tissue sample.



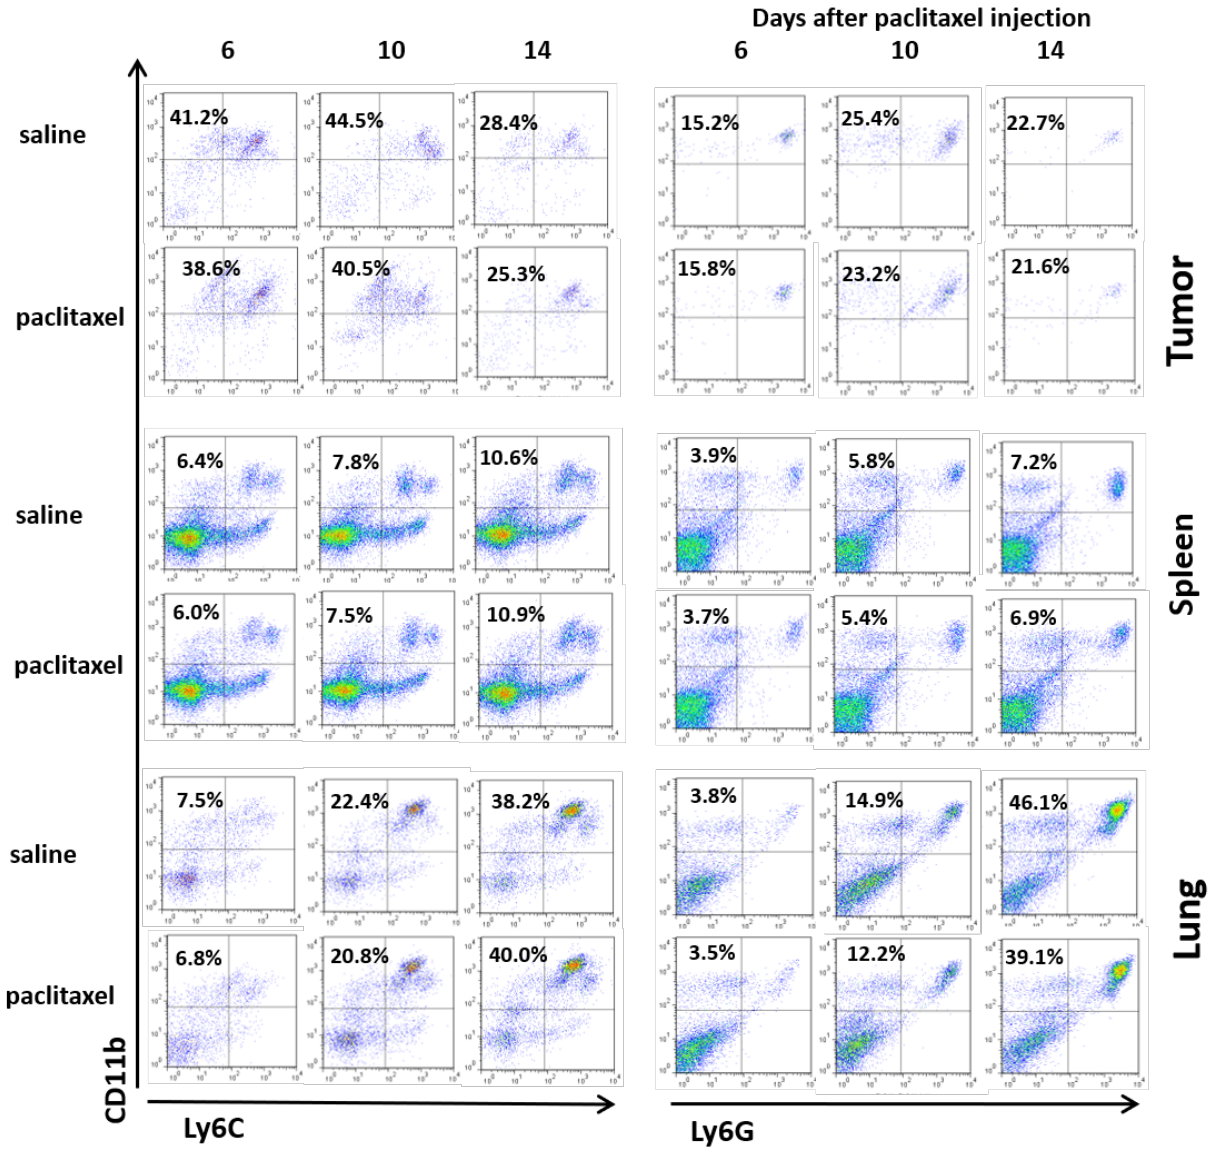

**Figure S7.** B16 melanoma-bearing mice were tail vein injected with saline and free paclitaxel, and tissues were harvested at different time points as shown. Tissues were digested, and single cell suspensions were prepared and stained as described in the experimental section. Representative flow cytometry results are shown for CD45 gated cell populations. The levels of monocytic CD11bLy6C<sup>high</sup>Ly6G<sup>low/neg</sup> M-MDSC and polymorphonuclear CD11bLy6C<sup>high</sup>Ly6G<sup>low/neg</sup> PMN-MDSC are shown. Two independent experiments revealed similar results.
